# Supplementary material
Source: publisher site journal article supplement (https://www.dovepress.com/article/446768)
Supplement: Supplementary file 1 [file get_supplementary_file.php]

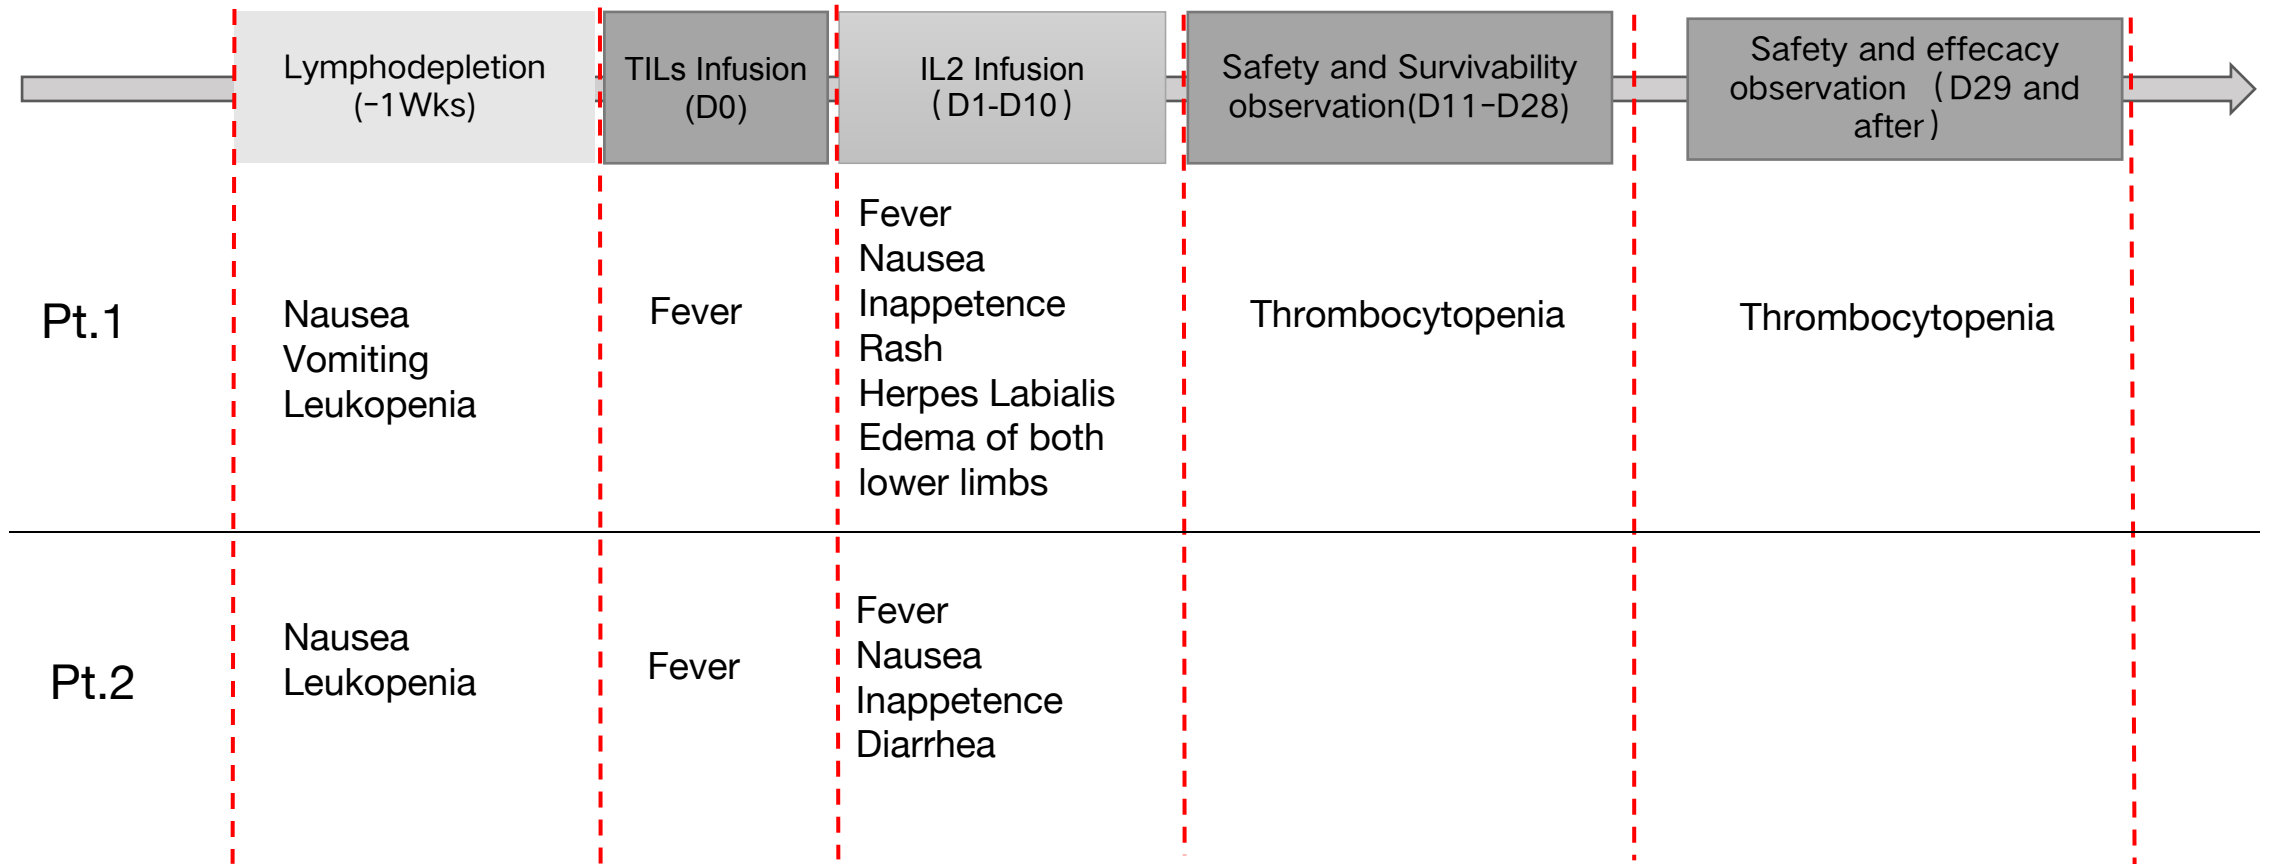

**Supplemental Fig.1** Timeline of the detailed side effects after TILs infusion of both patients.

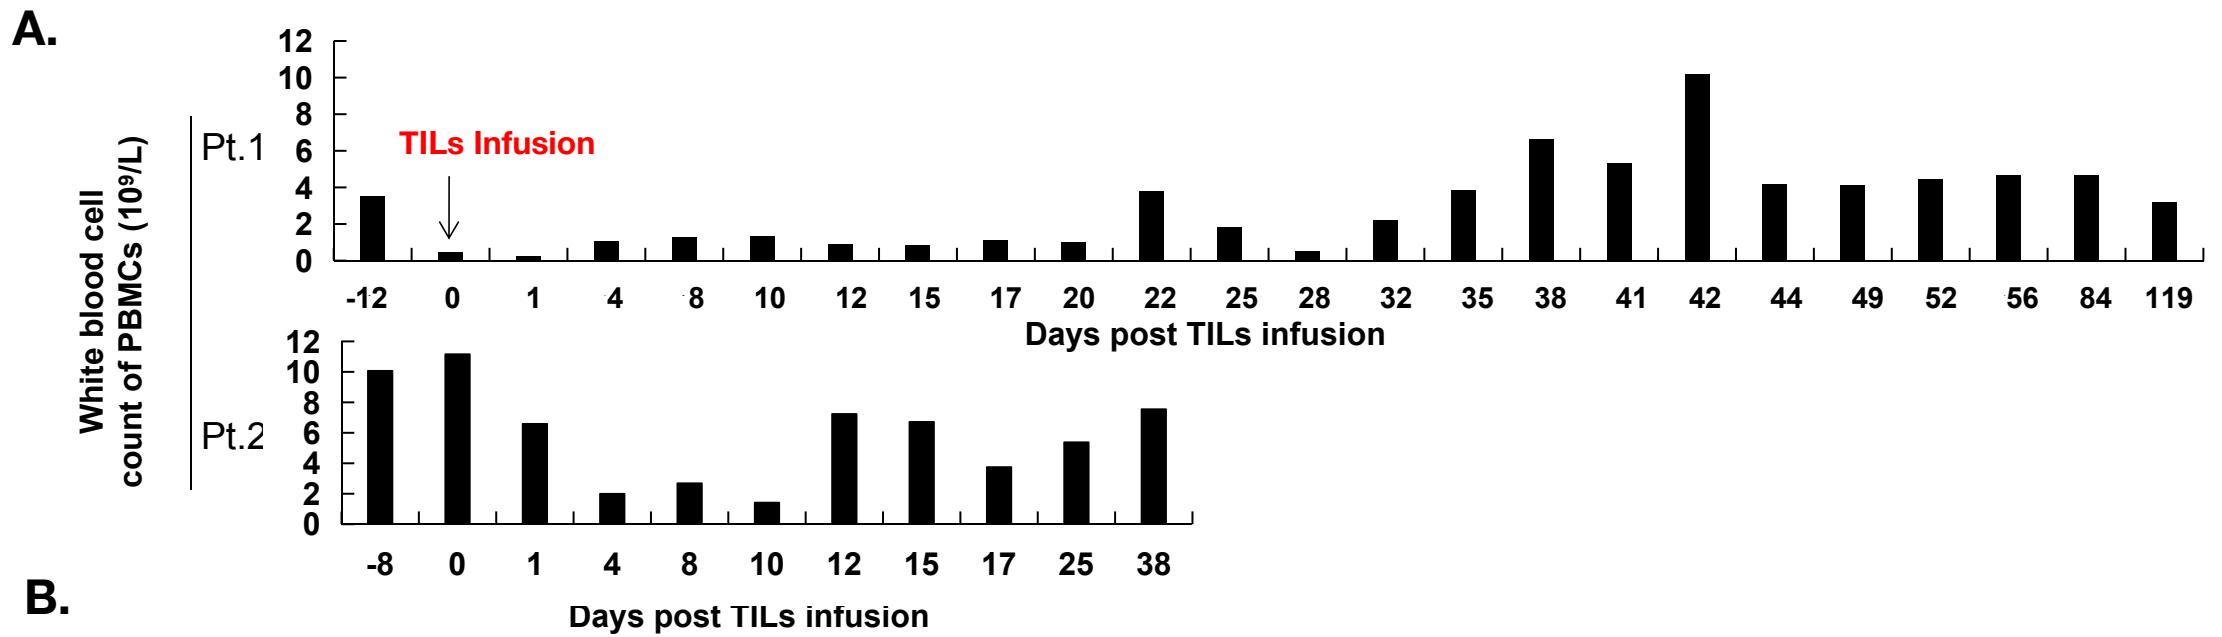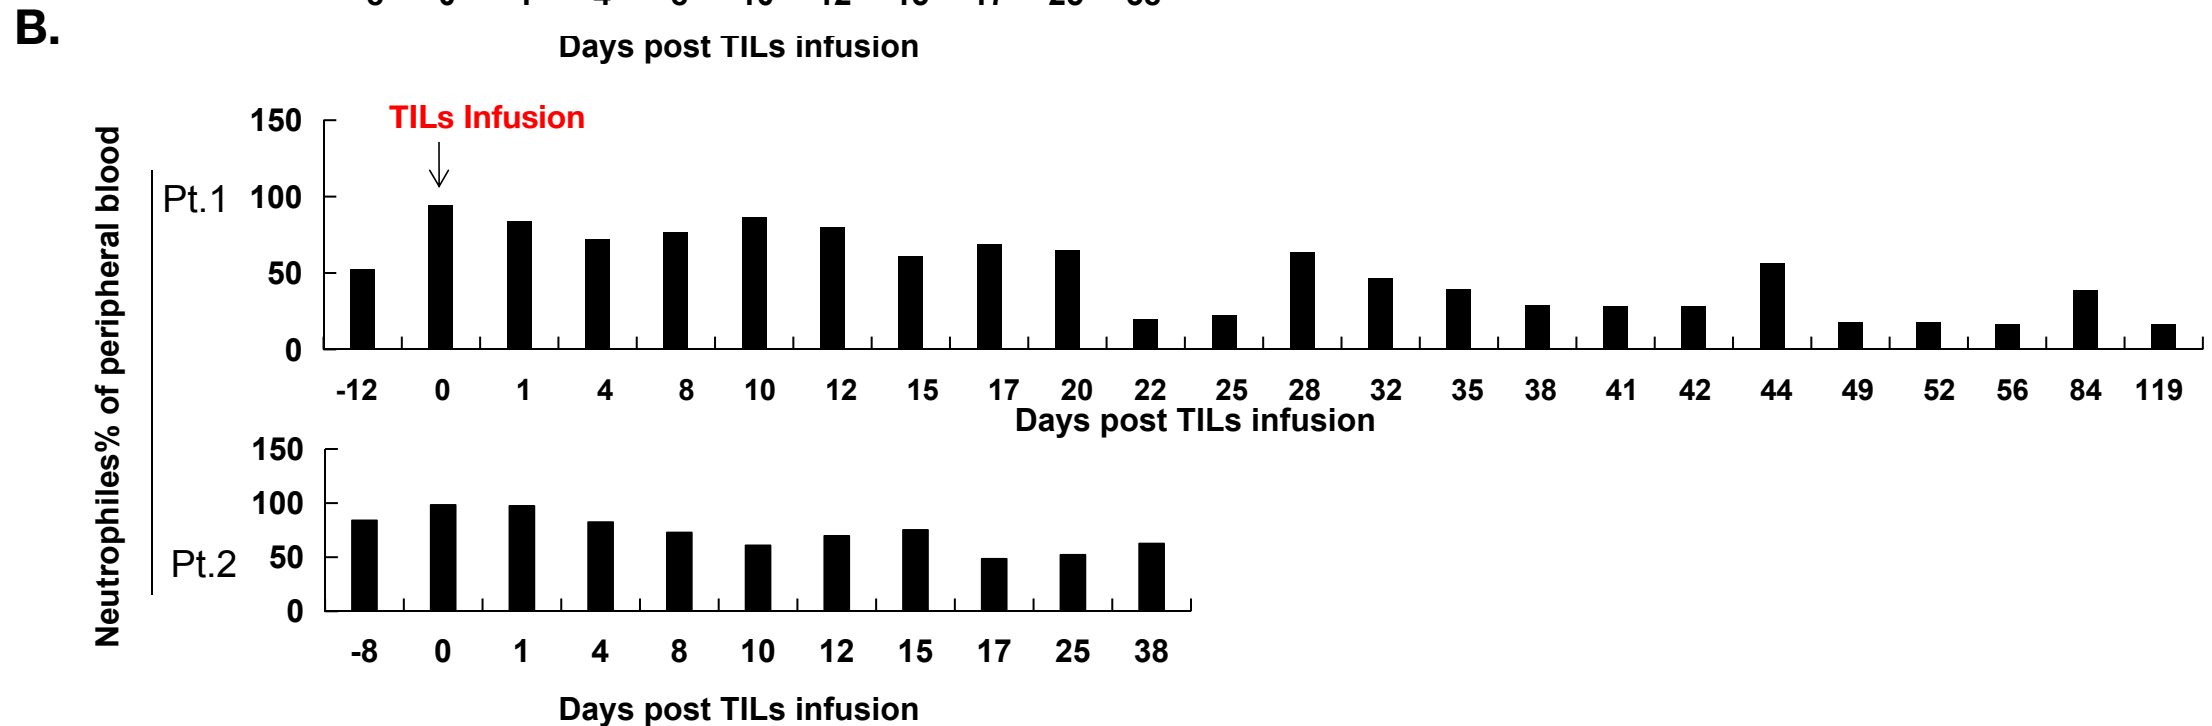

**Supplemental Fig.2** Peripheral blood cell analysis of the patient 1 and 2. White blood cell count (A.) and Neutrophile percentages (B.) of the patients over treatment.

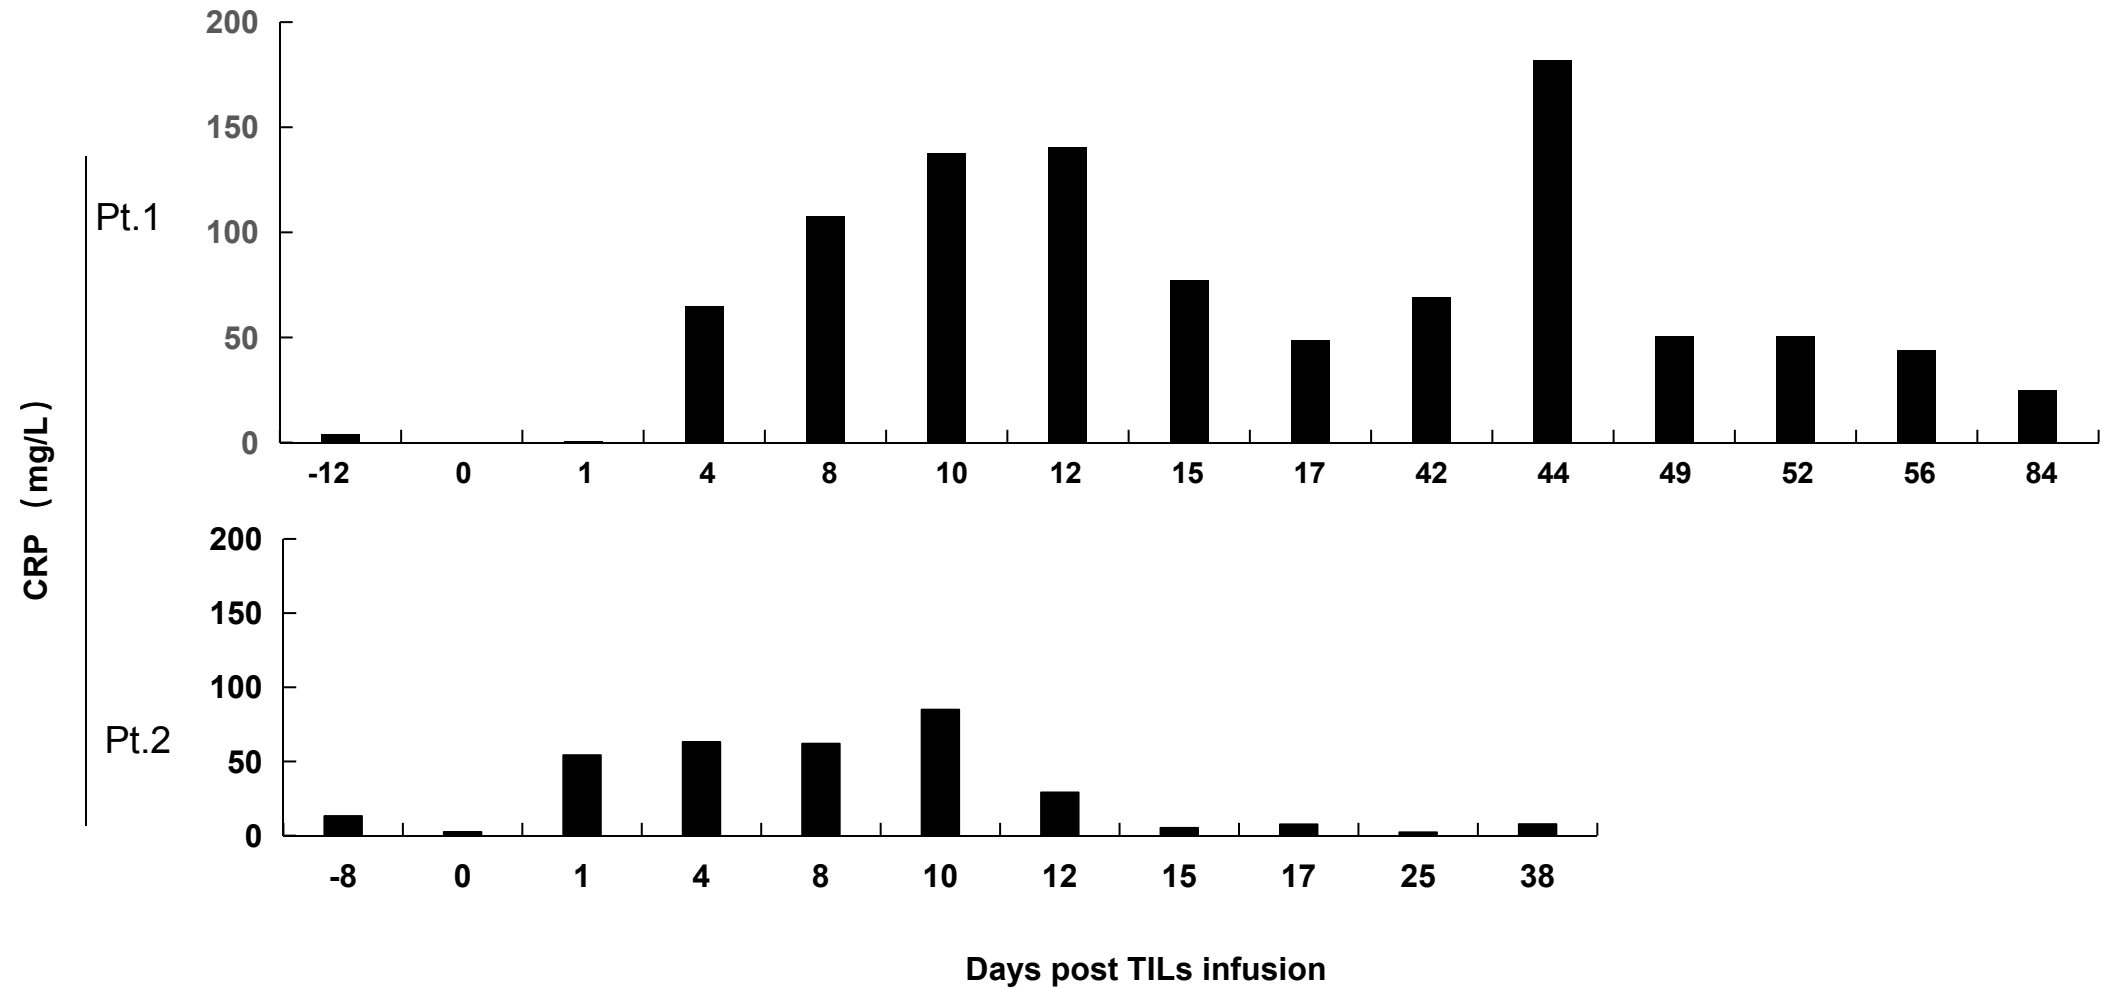

**Supplemental Fig.3** C-Reactive Protein (CRP) levels of peripheral blood of patient 1 and 2 over treatment.

**Supplemental Table 1** Summary of adverse events of the patient during treatment

| Adverse Events            | Grade (CTCAE 5.0) | No. Of patients | Correlative factor                               |
|---------------------------|-------------------|-----------------|--------------------------------------------------|
| Nausea                    | 2                 | 2/2             | lymphodepleting regimens, High dose IL2 infusion |
| Vomiting                  | 2                 | 1/2             | lymphodepleting regimens, High dose IL2 infusion |
| Inappetence               | 2                 | 2/2             | lymphodepleting regimens, High dose IL2 infusion |
| Leukopenia                | 3                 | 2/2             | lymphodepleting regimens                         |
| Thrombocytopenia          | 4                 | 1/2             | lymphodepleting regimens                         |
| Fever                     | 2                 | 2/2             | TILs in fusion , High dose IL2 infusion          |
| Rash                      | 1                 | 1/2             | High dose IL2 infusion                           |
| Herpes Labialis           | 1                 | 1/2             | High dose IL2 infusion                           |
| Edema of both lower limbs | 1                 | 1/2             | High dose IL2 infusion                           |
| Diarrhea                  | 1                 | 1/2             | High dose IL2 infusion                           |
